# Supplementary material
Source: PubMed Central journal article supplement (PMC8087739)
Supplement: 12250_2020_304_MOESM1_ESM.pdf [file 12250_2020_304_MOESM1_ESM.pdf]

## Electronic Supplementary Material

### African Swine Fever Virus MGF360-12L Inhibits Type I Interferon Production by Blocking the Interaction of Importin $\alpha$ and NF- $\kappa$ B Signaling Pathway

Yisha Zhuo<sup>1</sup> • Zeheng Guo<sup>1</sup> • Tongtong Ba<sup>1</sup> • Cheng Zhang<sup>1</sup> • Lihua He<sup>1</sup> • Cuiping Zeng<sup>1</sup> • Hanchuan Dai<sup>1</sup>✉

1. College of Veterinary Medicine, Huazhong Agricultural University, Wuhan, 430070, China

Supporting information to DOI: 10.1007/s12250-020-00304-4

**Table S1** Nucleotide sequence of primers for qPCR

| Gene           | Forward Primer (5'-3') | Reverse Primer (5'-3') |
|----------------|------------------------|------------------------|
| IFN- $\beta$   | TGCTCTCCTGTTGTGCTTCT   | CATAGATGGTCAATGCGGCG   |
| ISG54          | TATCACATGGGCCGACTCTC   | TGCCAGTCCAGAGGTGAATT   |
| ISG56          | TGGACCCTGAAAACCCTGAA   | TCTGTGAGGACATGTTGGCT   |
| STING          | AAGGGAATTTCAACGTGGCC   | GGCAGTTTATCCAGGAAGCG   |
| TBK1           | CAGCTACTGGATCACTGCCA   | ACCTGAAGACCCCGAGAAAG   |
| IRF3           | ACAGCAGGAGGATTTTCGGAA  | TTATGTGGGTTCGTGAGGGTC  |
| AP-1           | AACGTGACAGATGAGCAGGA   | CTGGGTTGAAGTTGCTGAGG   |
| NF- $\kappa$ B | CATTTCCAAGCCAGCCAGAG   | TGCCTCTTCAGATCGAGCTT   |
| GAPDH          | TCATGACCACAGTCCATGCC   | GGATGACCTTGCCCACAGCC   |

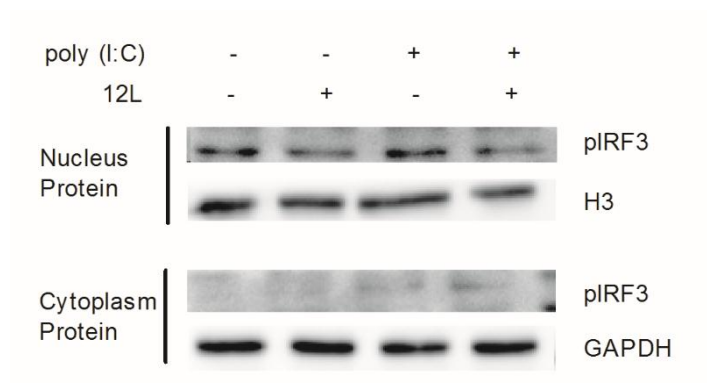

**Fig. S1** *MGF360-12L* can suppress IRF3 nuclear translocation. HeLa cells were transfected with a plasmid encoding *MGF360-12L* or with empty vector (EV). 24 h later, cells were left untreated or transfected with poly (I: C) (5  $\mu$ g/mL) and incubated for another 12 h, followed by lysis. Cell lysates were separated into cytoplasmic and nuclear extracts, and the protein levels of pIRF3 in nuclear extract were analyzed by Western blotting. Protein levels of pIRF3 were quantified by Western blotting and normalized to the expression of of GAPDH or Histone H3.
